# Supplementary material
Source: MDPI journal article supplement (https://www.mdpi.com/1424-8247/13/12/433)
Supplement: s1 [file s1]

# SUPPLEMENTARY MATERIAL

## Synthesis of platinum(II) complexes with some 1-methylnitropyrroles and *in vitro* research on their cytotoxic activity

Henryk Mastalarz<sup>1\*</sup>, Agnieszka Mastalarz<sup>2</sup>, Joanna Wietrzyk<sup>3</sup>, Magdalena Milczarek<sup>3</sup>, Andrzej Kochel<sup>2</sup> and Andrzej Regiec<sup>1</sup>

<sup>1</sup> Department of Organic Chemistry, Faculty of Pharmacy, Wrocław Medical University,  
211A Borowska Street, 50-556 Wrocław, Poland

<sup>2</sup> Faculty of Chemistry, Wrocław University, 14F Joliot-Curie Street, 50-383 Wrocław, Poland

<sup>3</sup> Hirsfeld Institute of Immunology and Experimental Therapy Polish Academy of Sciences, 12 Rudolf Weigl Street, 53-114 Wrocław, Poland

### Table of Contents

|                                                                                                        |          |
|--------------------------------------------------------------------------------------------------------|----------|
| Simulated ESI MS spectra of compounds <b>1</b> and <b>2</b> (Fig. S1-4)                                | p. 2     |
| Experimental ESI MS spectra of compounds <b>1-8</b> (Fig. S5-12)                                       | pp 3-7   |
| Experimental far IR spectra of compounds <b>1-8</b> (Fig. S13-20)                                      | pp 8-11  |
| Experimental <sup>1</sup> H and <sup>195</sup> Pt NMR spectra of compounds <b>1- 2</b> (Fig. S21, S22) | p. 12    |
| Experimental <sup>1</sup> H NMR spectra of compounds <b>3-8</b> (Fig. S23-26)                          | pp 13-16 |
| Molecular crystallographic structure of compound <b>1</b> (FigS27)                                     | p. 16    |
| Selected X-ray data for compound <b>1</b> (Table 5)                                                    | p. 17    |

---

\*Corresponding author, e-mail: Henryk Mastalarz (henryk.mastalarz@umed.wroc.pl)

Simulated (Fig. S1-3) and experimental (Fig. S5 -12) molecular and isotope peaks in ESI-MS spectrum for compound **1** and **2**. Simulation performed with Compass DataAnalysis Software version. 4.2 (copyright 1993-2003 Bruker Daltonik GmbH).

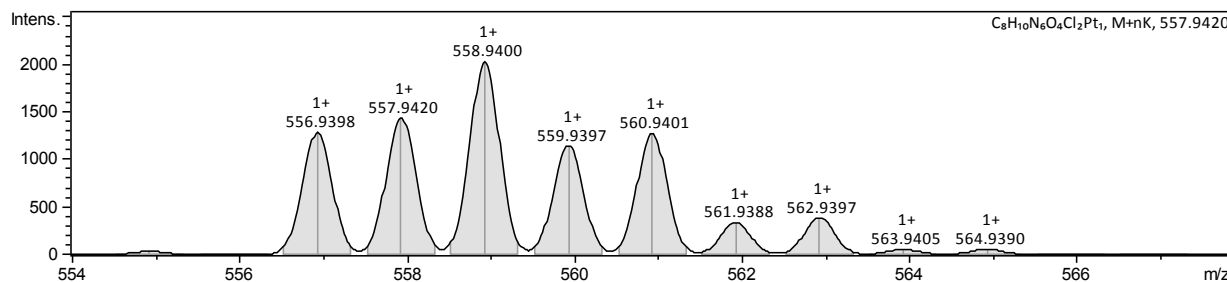

**Fig.S1.** Simulated quasi molecular (557.9420 Da) and isotope peaks for formula  $C_8H_{10}N_6O_4Cl_2Pt+K^+$  in ESI-MS (positive ionization) spectrum

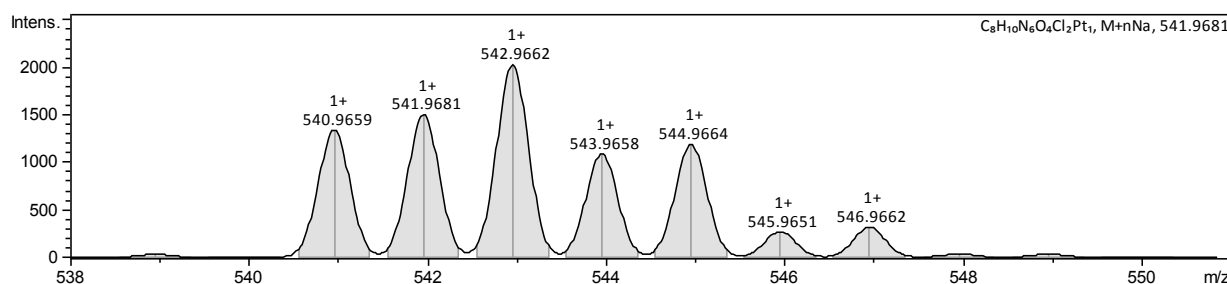

**Fig.S2.** Simulated quasi molecular (541.9681 Da) and isotope peaks formula  $C_8H_{10}N_6O_4Cl_2Pt+Na^+$  in ESI-MS (positive ionization)

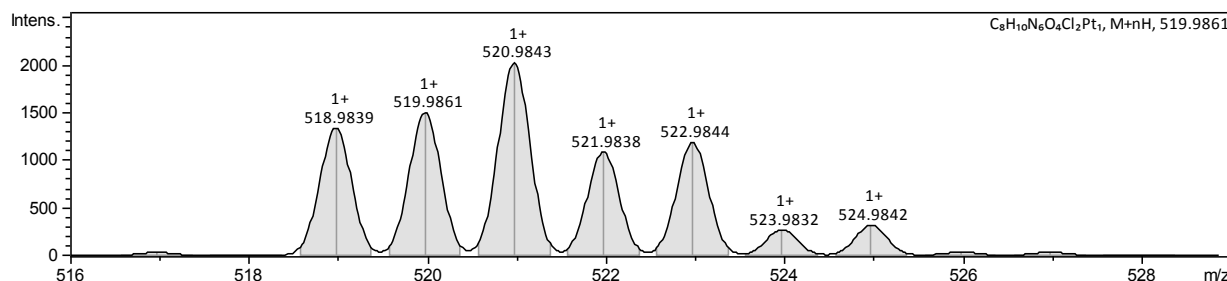

**Fig.S3.** Simulated quasi molecular (519.9861 Da) and isotope peaks for formula  $C_8H_{10}N_6O_4Cl_2Pt+H^+$  in ESI-MS (positive ionization)

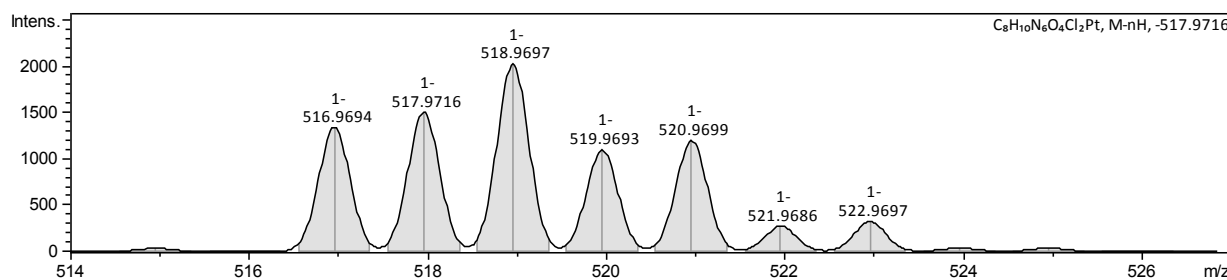

**Fig.S4.** Simulated quasi molecular (517.9716 Da) and isotope peaks for formula  $[C_8H_{10}N_6O_4Cl_2Pt-H]^-$  in ESI-MS (negative ionization)

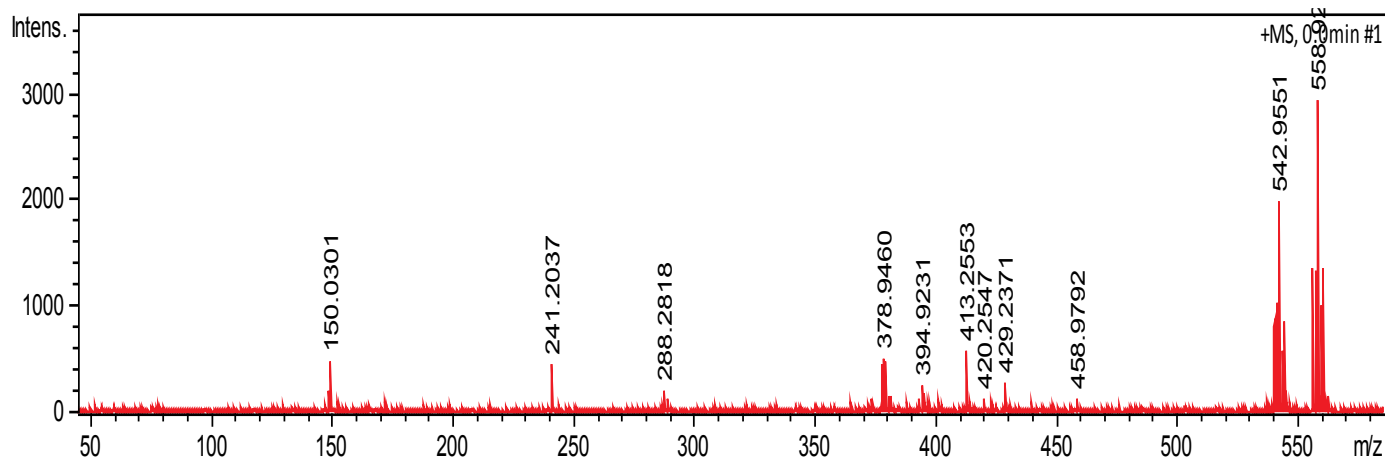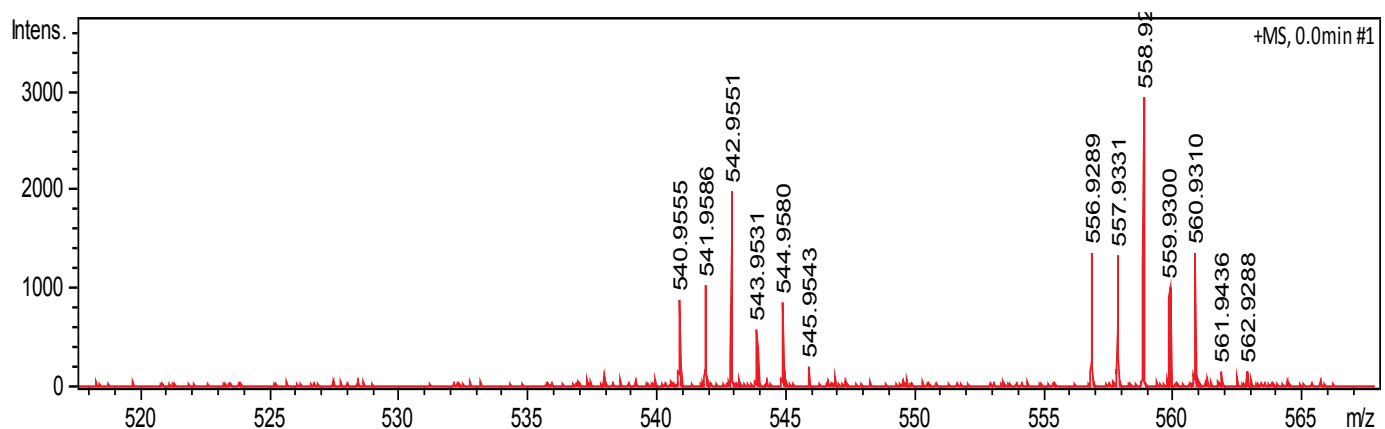

**Fig.S5.** Experimental ESI-MS (positive ionization in MeOH) spectrum of the compounds **1** and **2**. Quasi molecular and isotope peaks for formula  $C_8H_{10}N_6O_4Cl_2Pt+Na^+$  (541.9586 Da) and for formula  $C_8H_{10}N_6O_4Cl_2Pt+K^+$  (557.9331 Da).

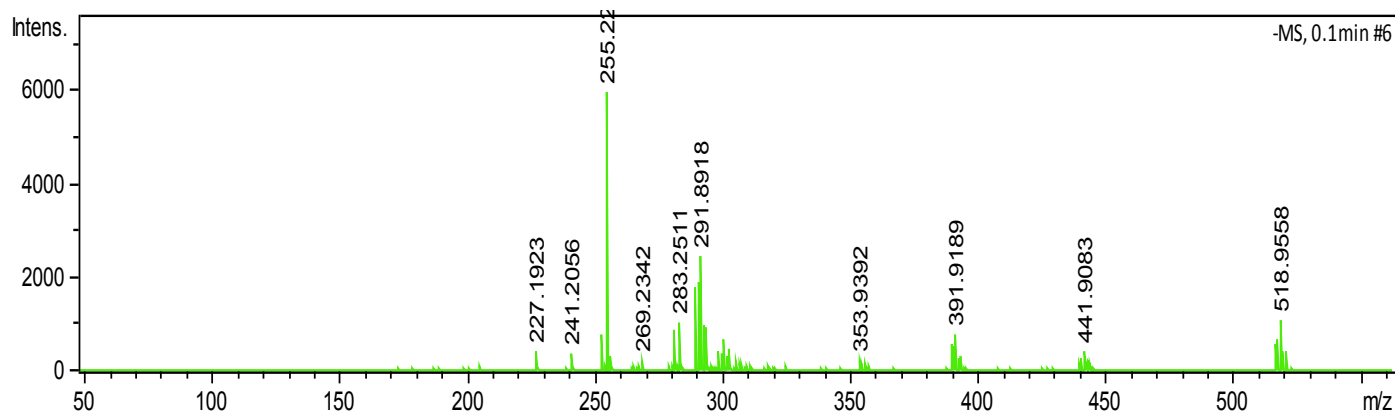

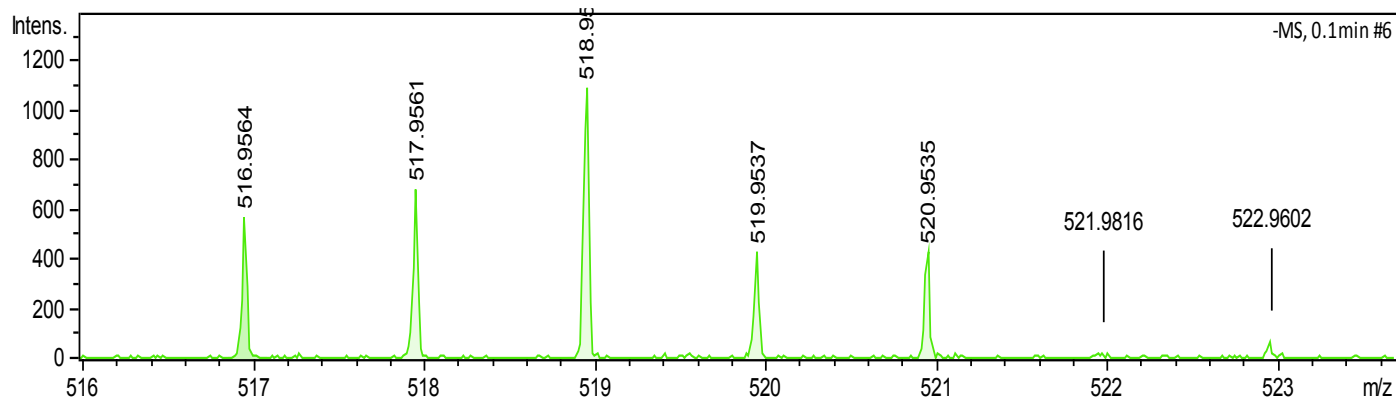

**Fig.S6.** Experimental ESI-MS (negative ionization in MeOH) spectrum of the compounds **1** and **2**. Quasi molecular and isotope peaks for formula  $[\text{C}_8\text{H}_{10}\text{N}_6\text{O}_4\text{Cl}_2\text{Pt-H}]^-$  (517.9561 Da).

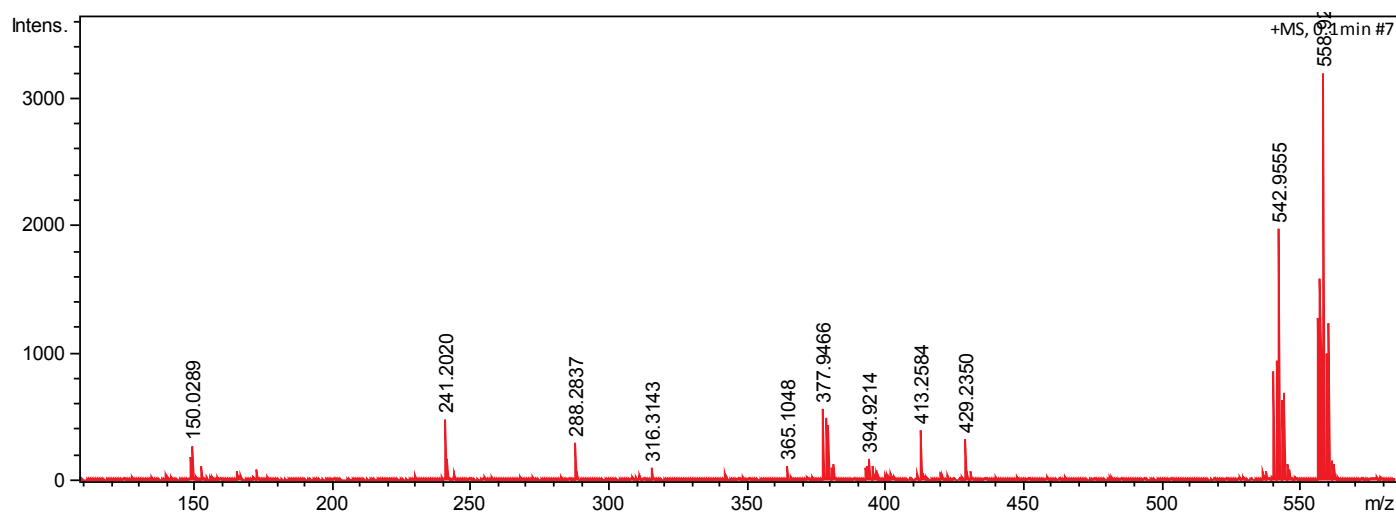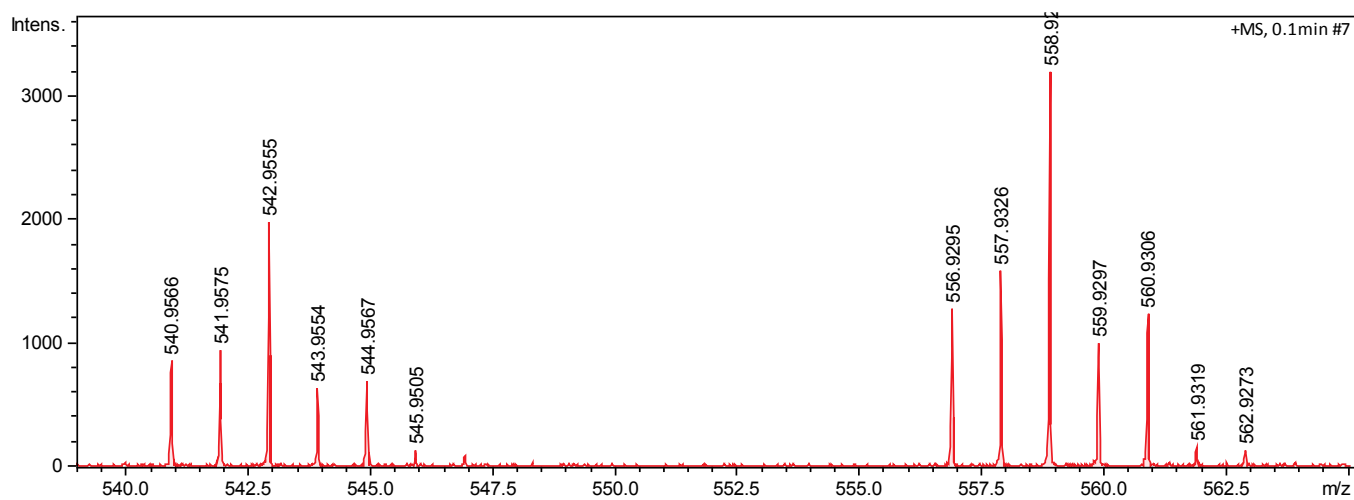

**Fig.S7** Experimental ESI-MS (positive ionization in MeOH) spectrum of the compounds **3** and **4**

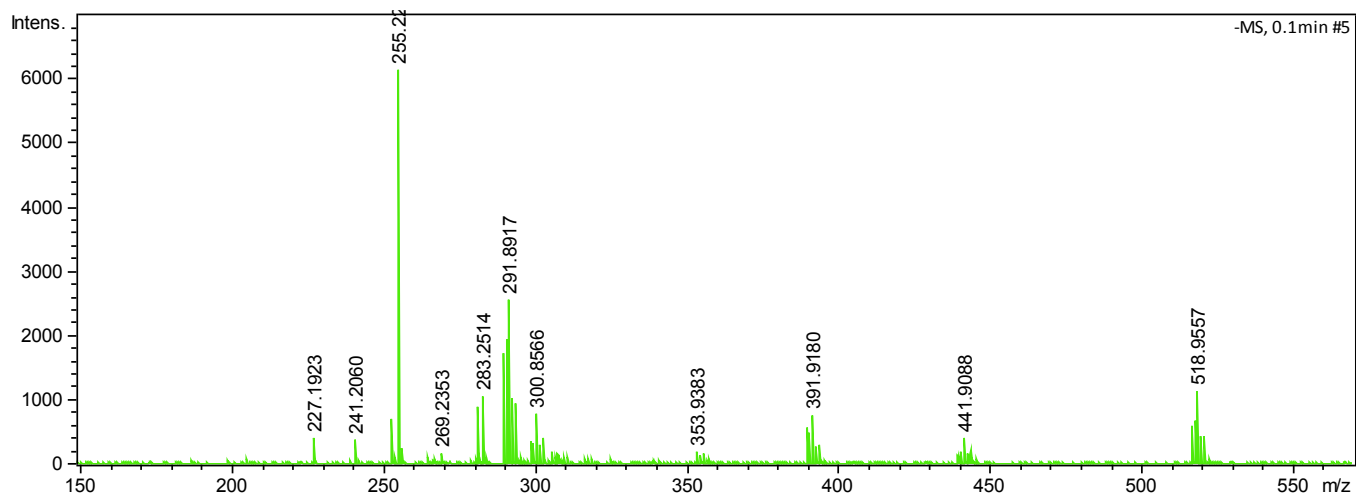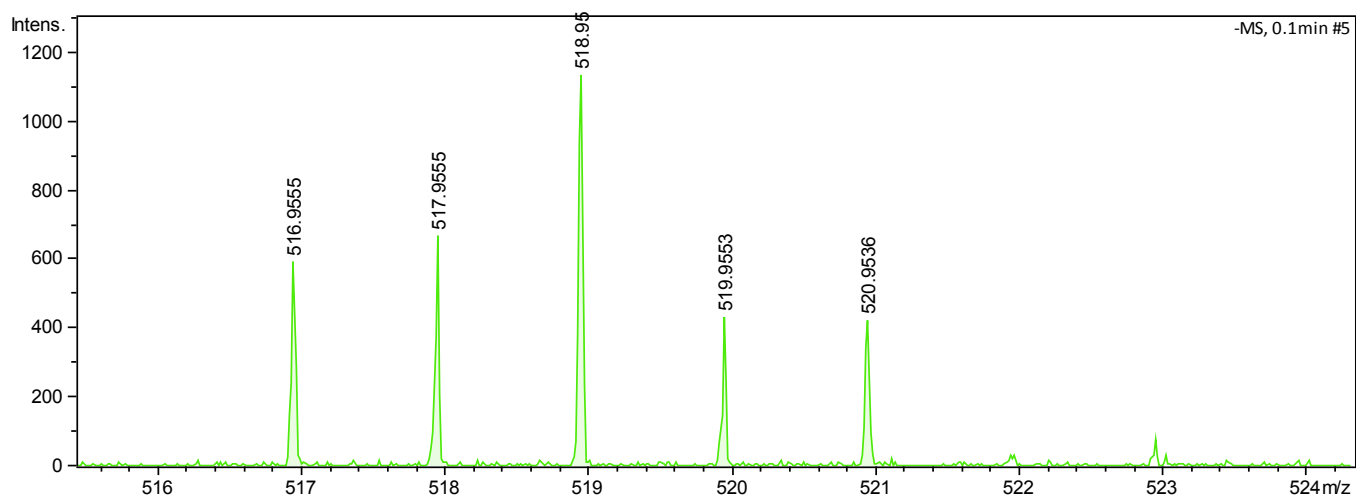

**Fig.S8** Experimental ESI-MS (negative ionization in MeOH) spectrum of the compounds **3** and **4**

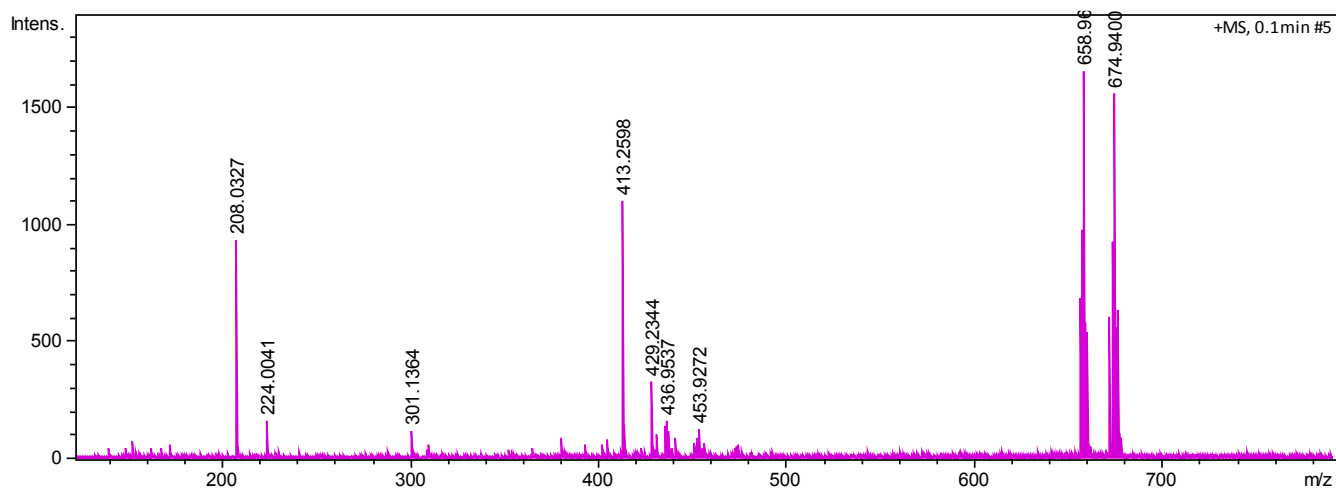

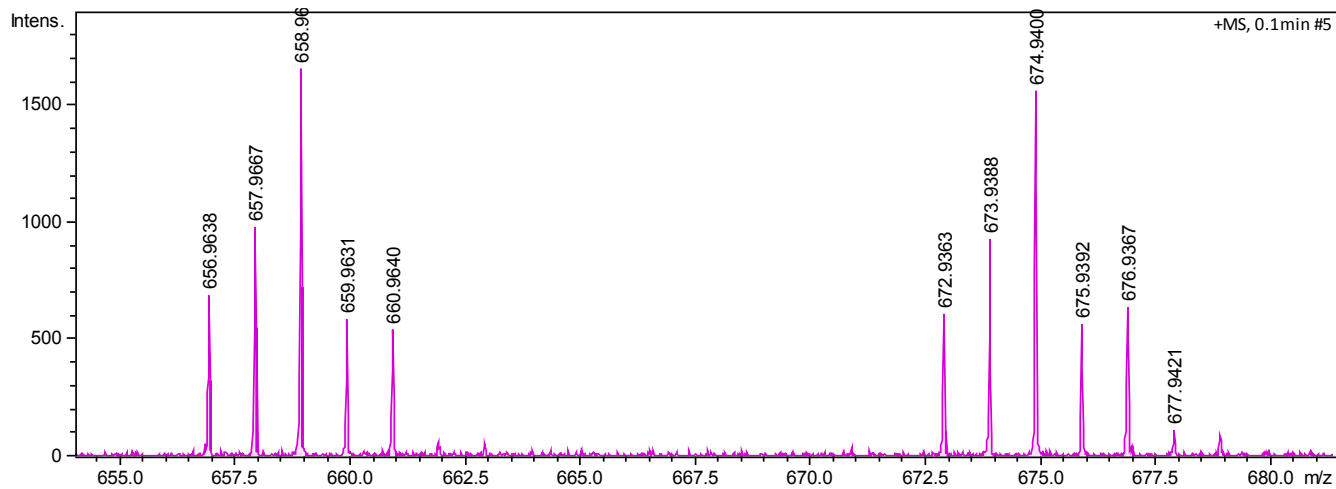

**Fig.S9** Experimental ESI-MS (positive ionization in MeOH) spectrum of the compounds **5** and **6**

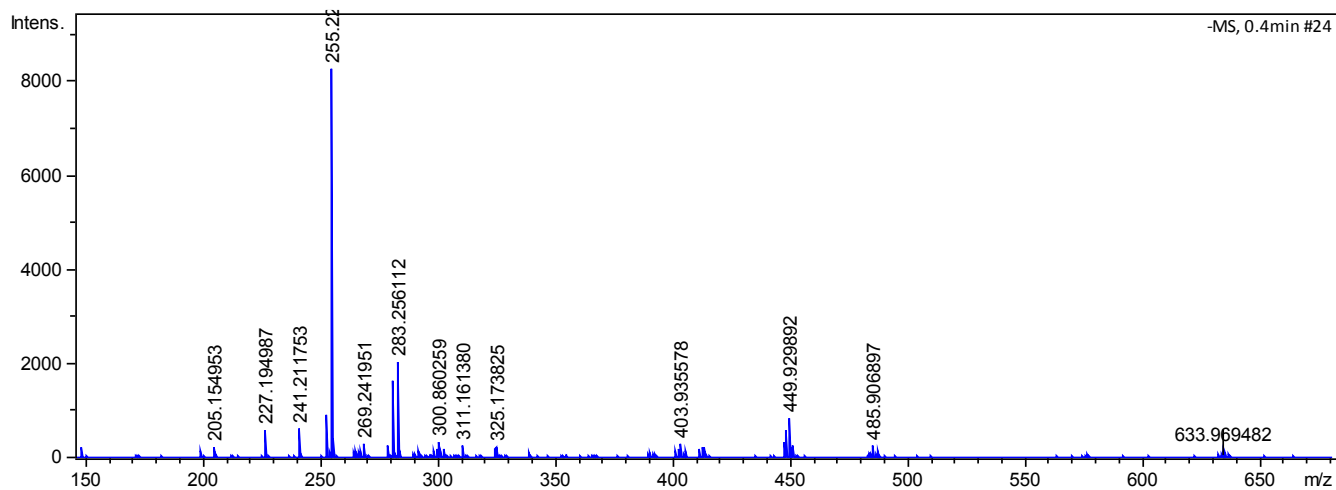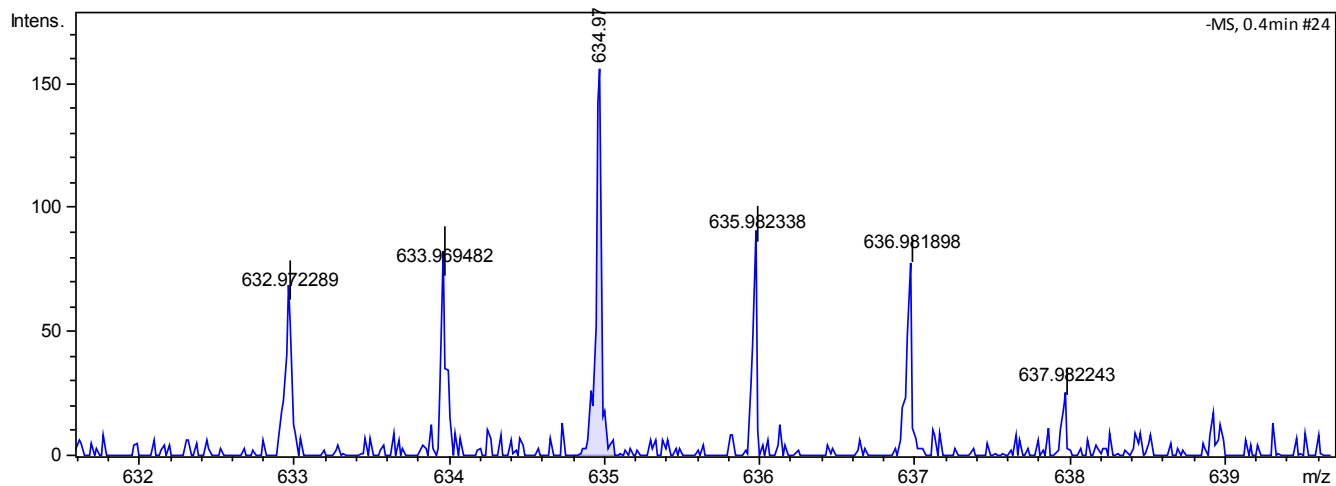

**Fig.S10** Experimental ESI-MS (negative ionization in MeOH) spectrum of the compounds **5** and **6**

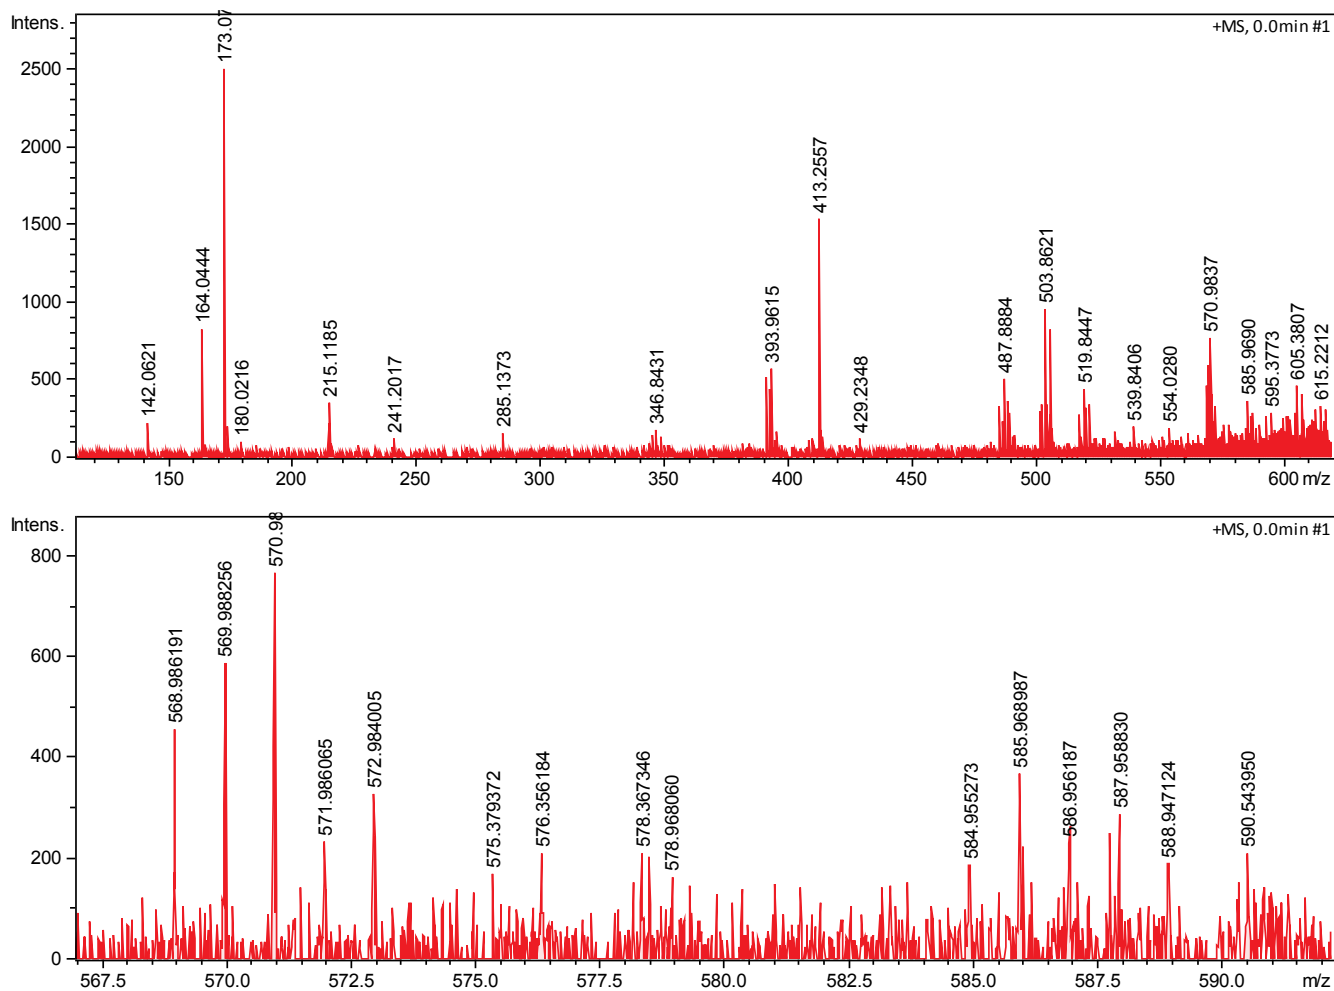

**Fig.S11** Experimental ESI-MS (positive ionization in MeOH) spectrum of the compound **7**.

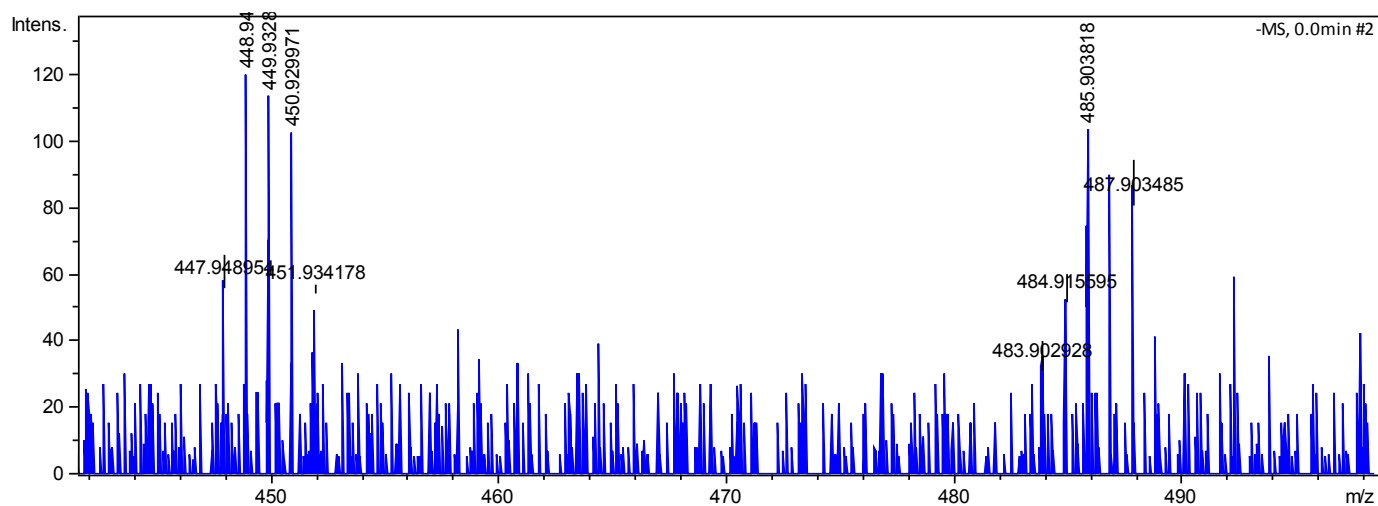

**Fig.12** Experimental ESI-MS (negative ionization in MeOH) spectrum of the compound **8**

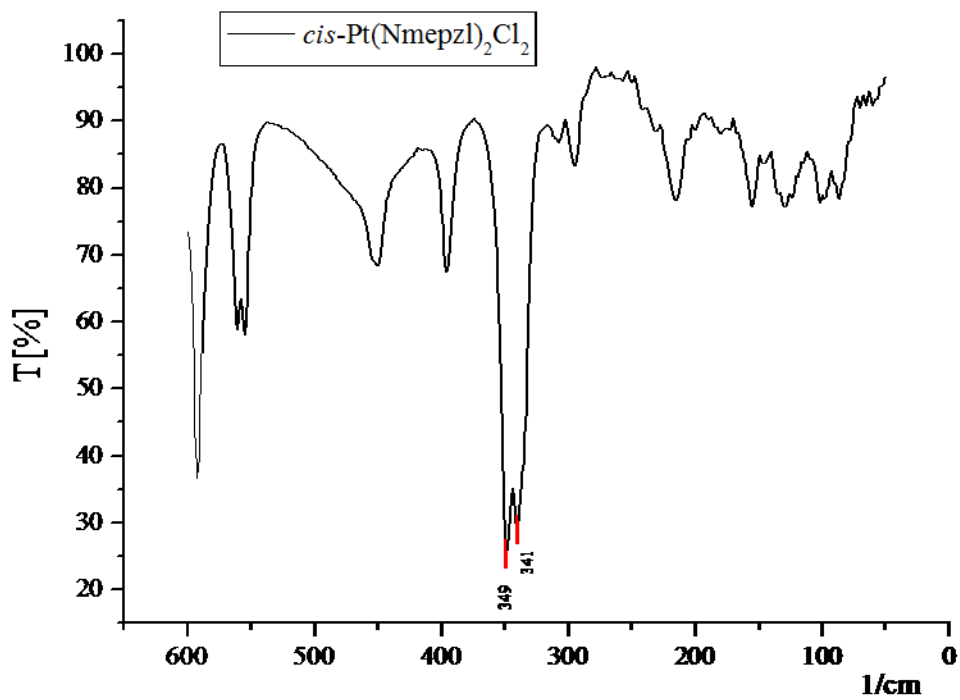

Fig.S13 Experimental far IR spectrum of the *cis* complex 1

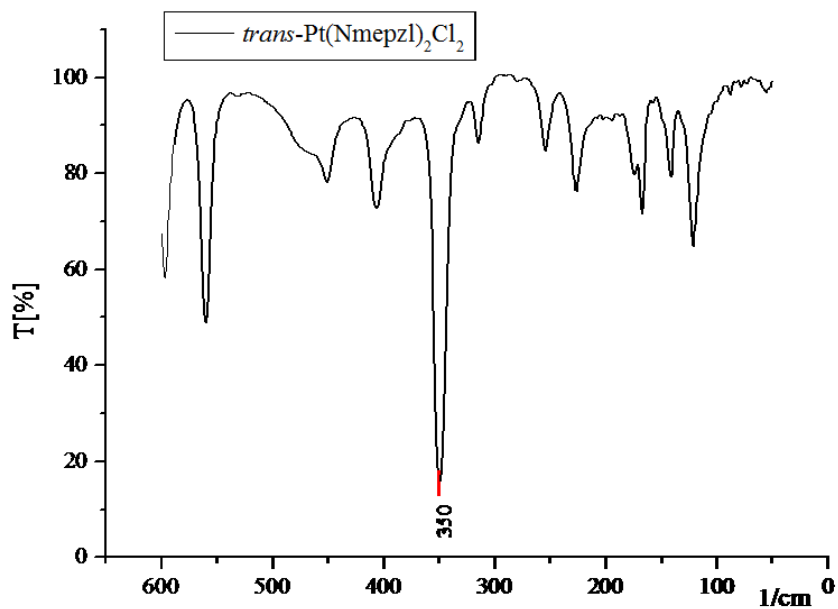

Fig.S14 Experimental far IR spectrum of the *trans* complex 2

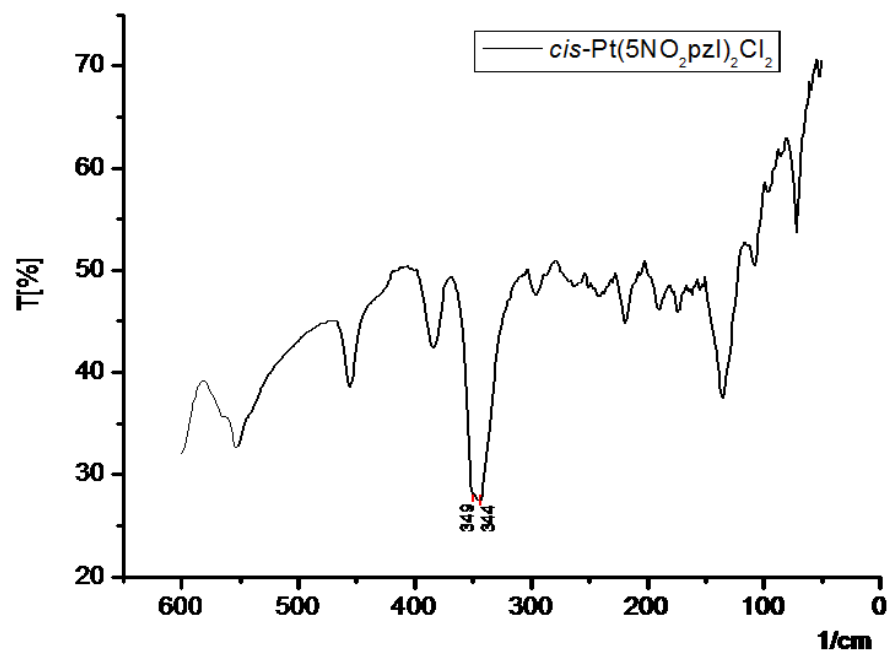

Fig.S15 Experimental far IR spectrum of the *cis* complex 3

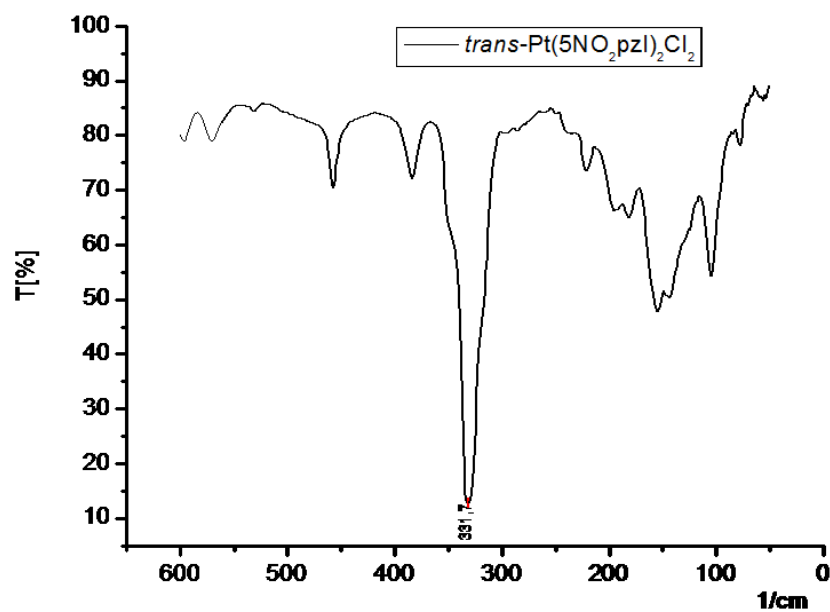

Fig.S16 Experimental far IR spectrum of the *trans* complex 4

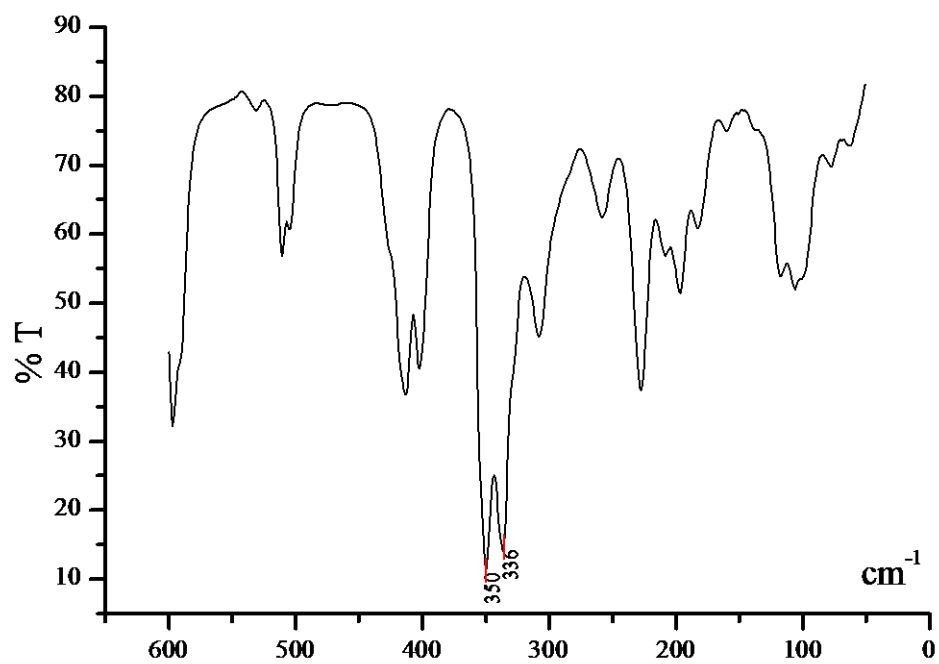

**Fig.S17** Experimental far IR spectrum of the *cis* complex 5

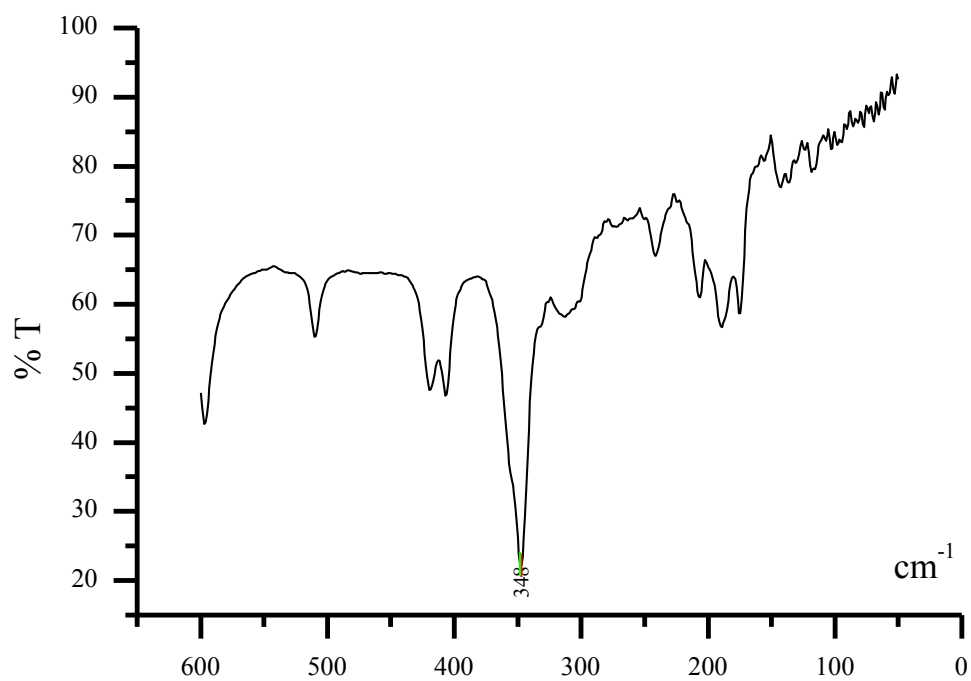

**Fig.S18** Experimental far IR spectrum of the *trans* complex 6

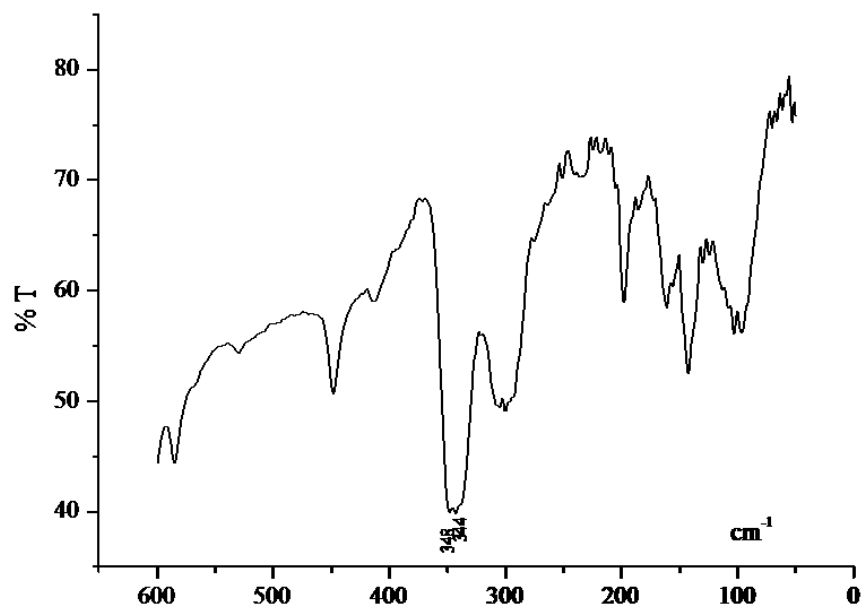

**Fig.S19** Experimental far IR spectrum of the *cis* complex 7

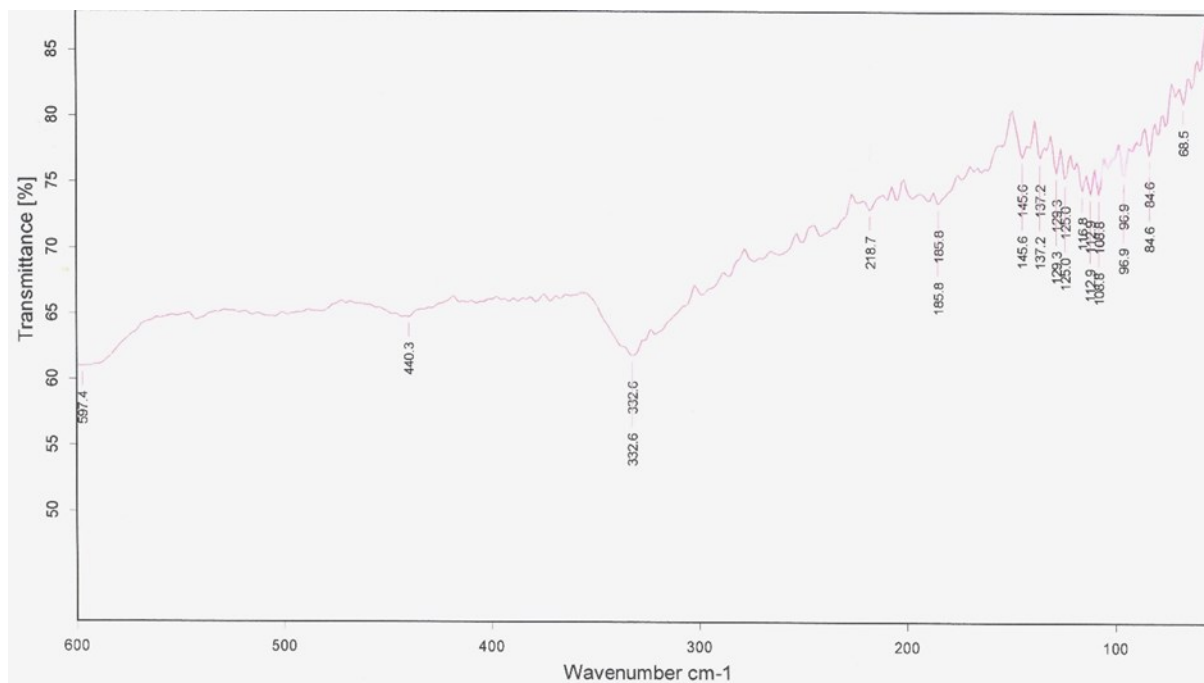

**Fig.S20** Experimental far IR spectrum of the compound 8

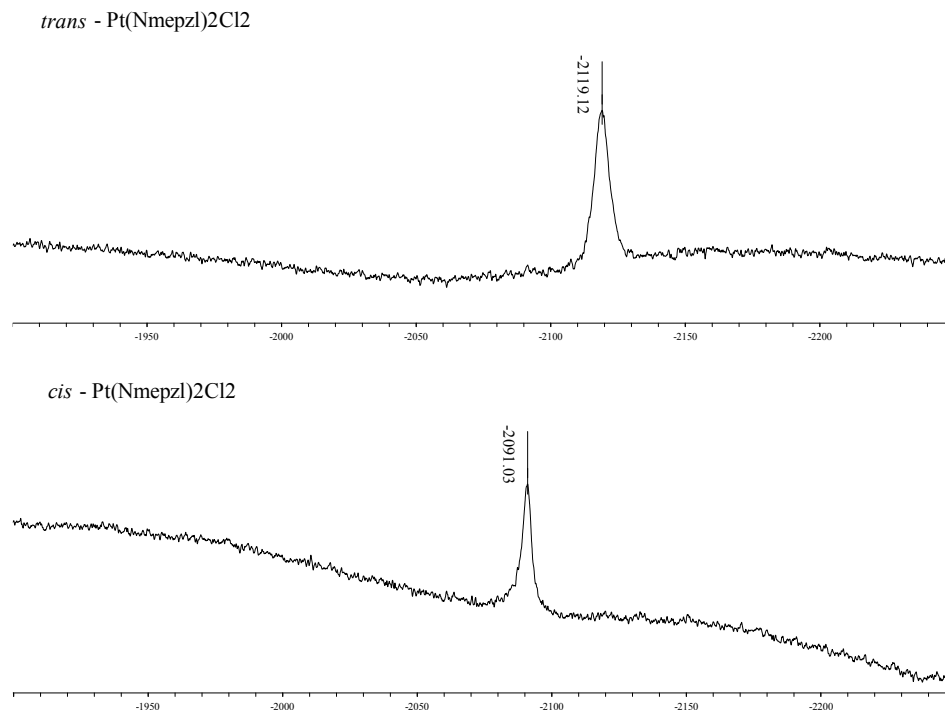

**Fig. S21** <sup>195</sup>Pt NMR (acetone-d<sub>6</sub>) spectra of *cis*- and *trans*-Pt(Nmepzl)<sub>2</sub>Cl<sub>2</sub> (**1** and **2** respectively)

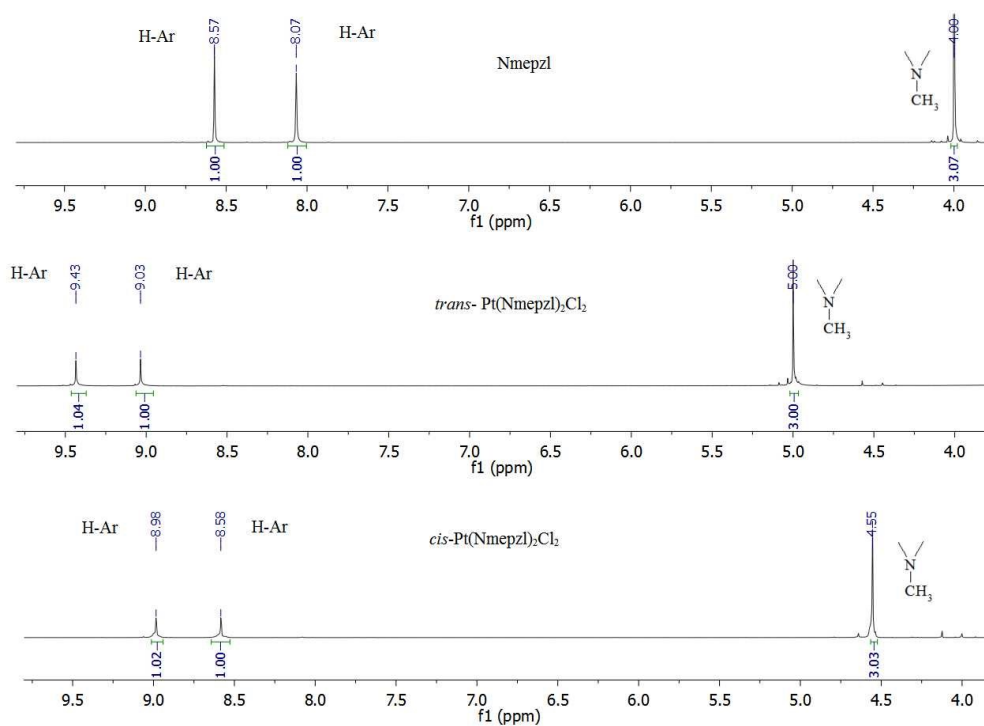

**Fig. S22** Experimental <sup>1</sup>H NMR (acetone-d<sub>6</sub>) spectra of *cis*- and *trans*-Pt(Nmepzl)<sub>2</sub>Cl<sub>2</sub> (compounds **1** i **2** respectively) in comparison to 1-methyl-4-nitropyrazole.

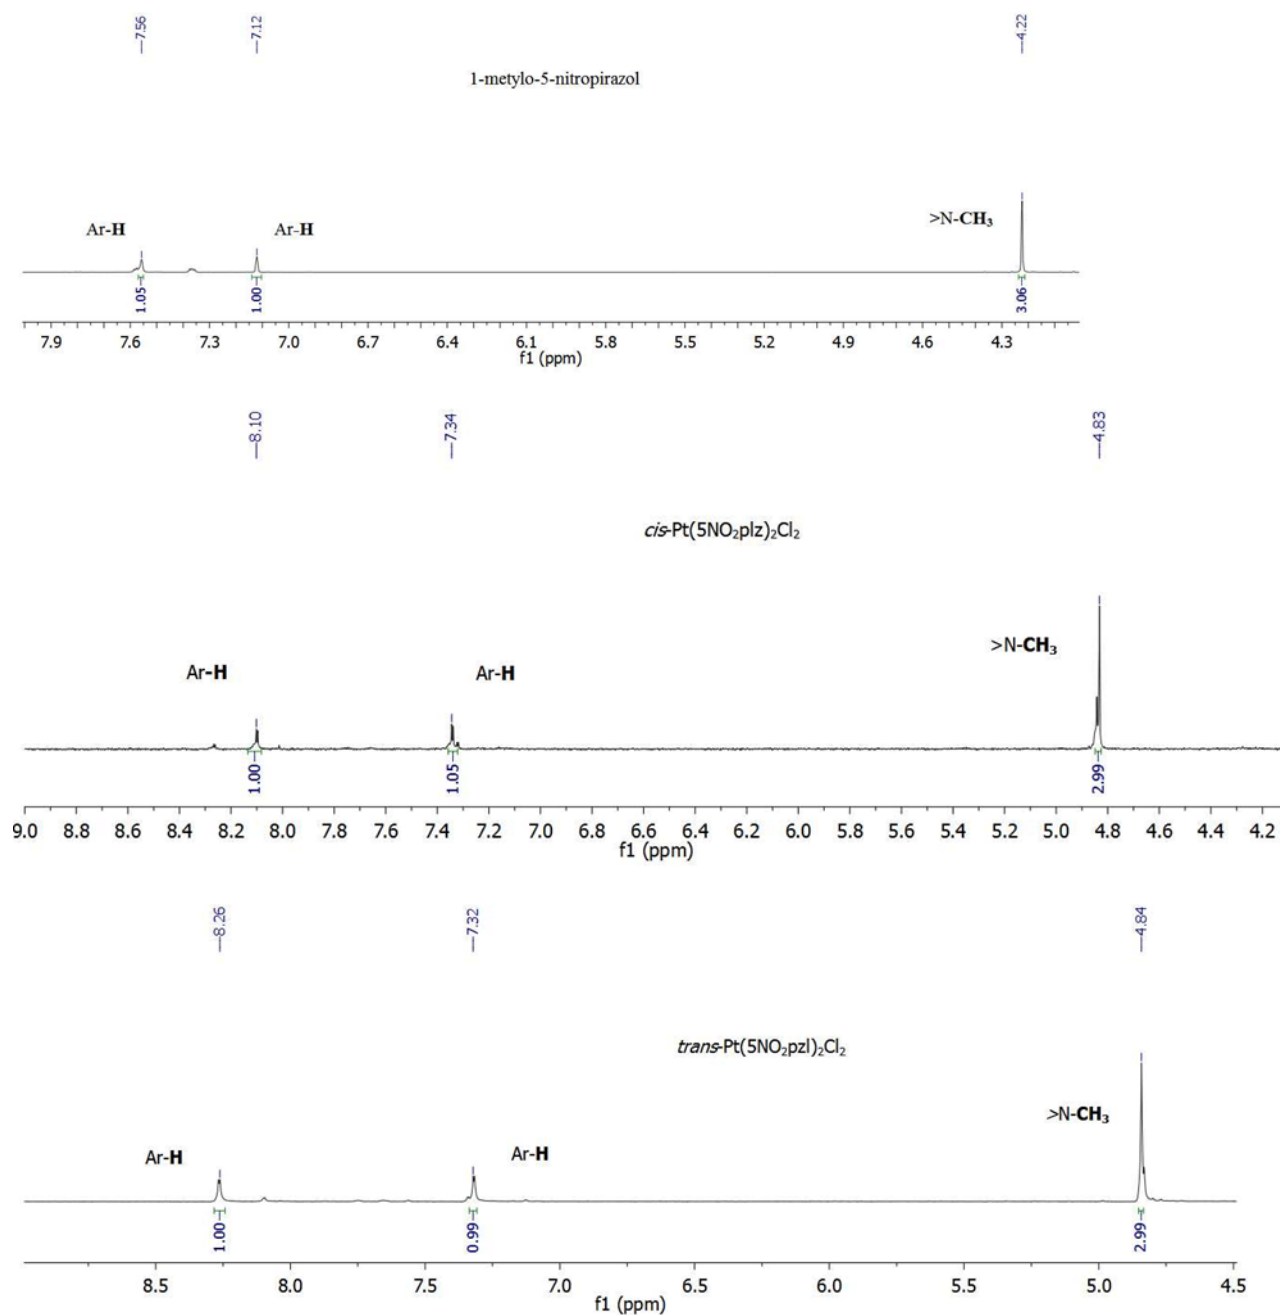

**Fig. S23** Experimental <sup>1</sup>H NMR (acetone-d<sub>6</sub>) spectra of *cis*- and *trans*-Pt(5NO<sub>2</sub>pzl)<sub>2</sub>Cl<sub>2</sub> (compounds **3** and **4** respectively) in comparison to 1-methyl-5-nitropyrazole.

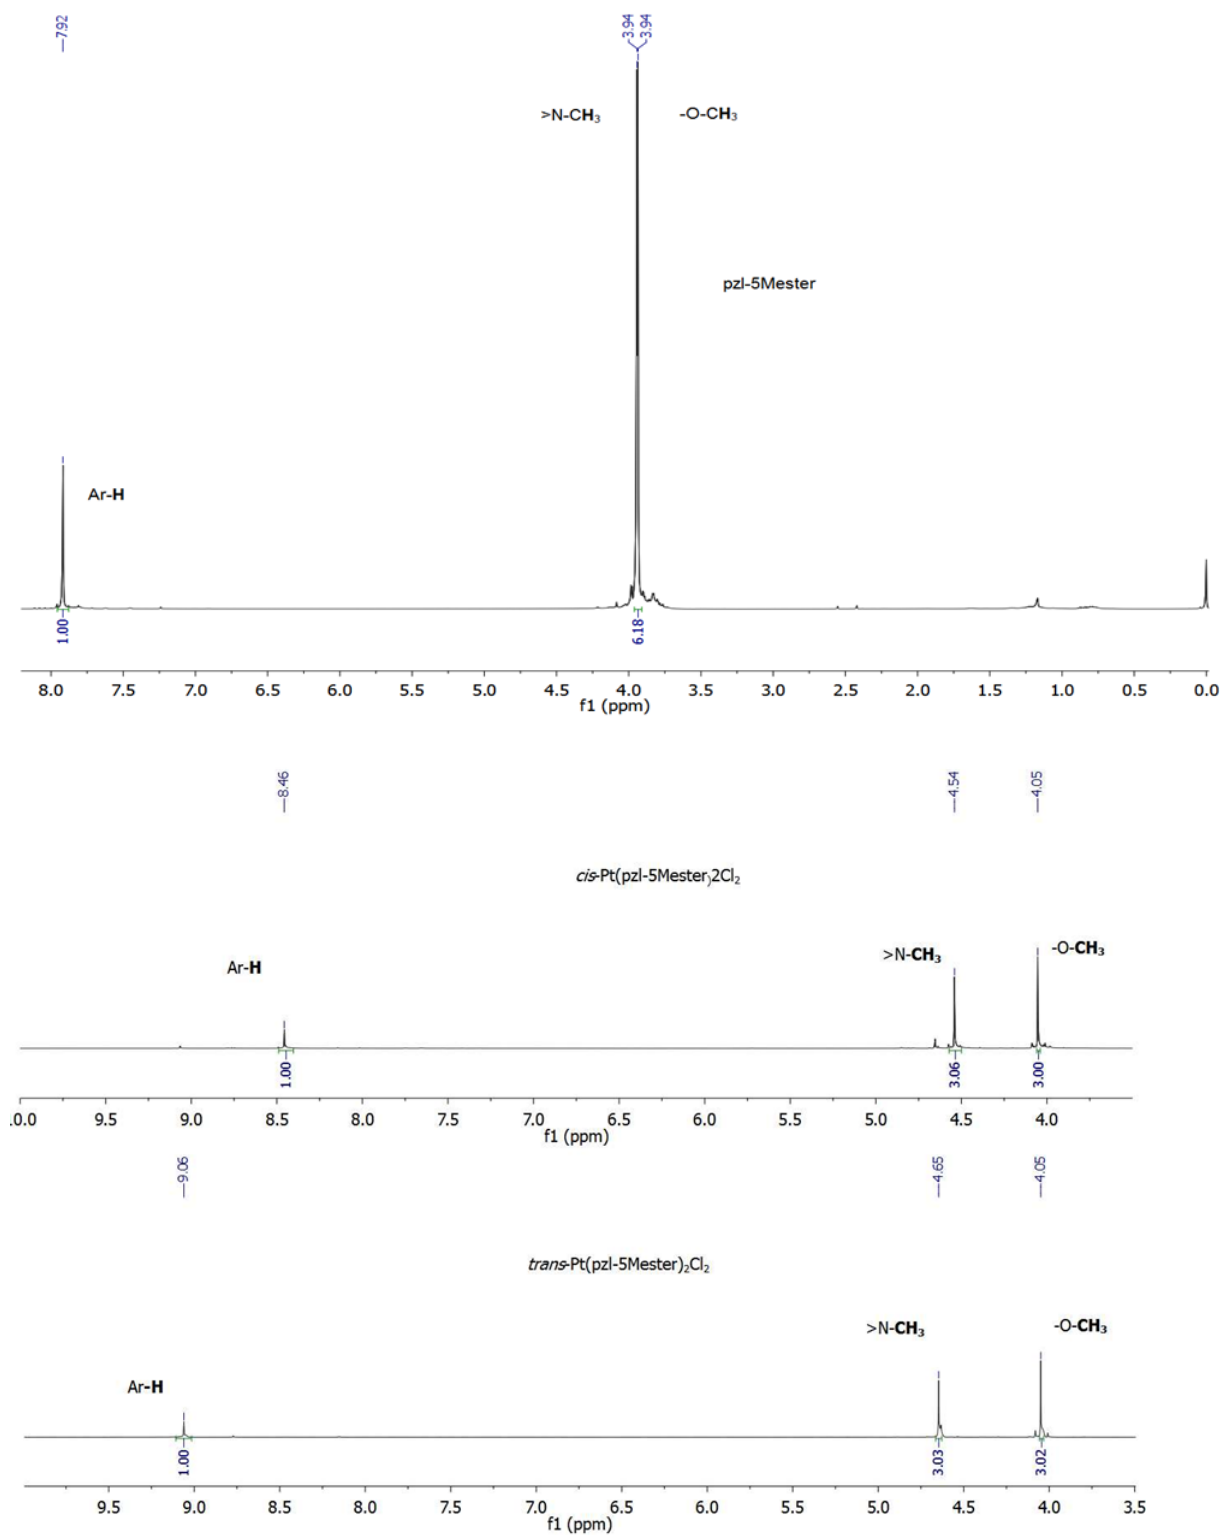

**Fig. S24** Experimental  $^1\text{H}$  NMR (acetone- $d_6$ ) spectra of *cis*- and *trans*-Pt(pzl-5-Mester)<sub>2</sub>Cl<sub>2</sub> (compounds **5** and **6** respectively) in comparison to 1-methyl-4-nitropyrazole-5-carboxylic acid methyl ester.

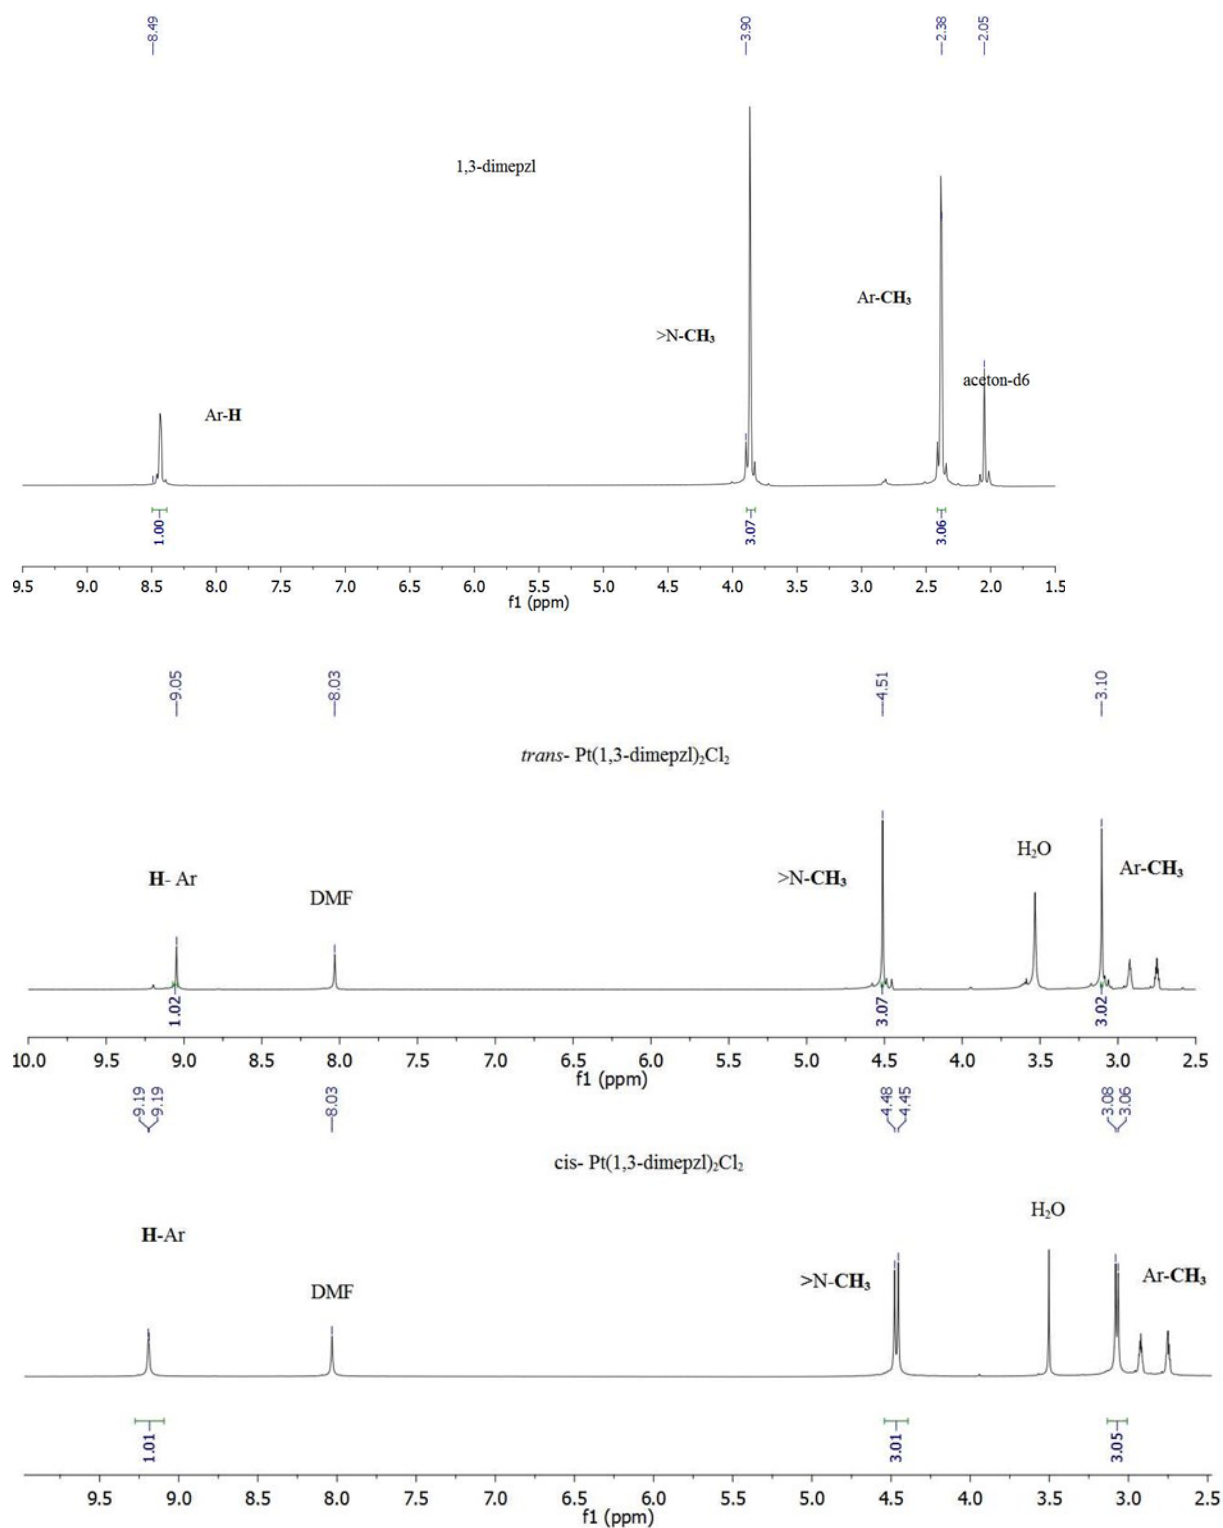

**Fig. S25** Experimental  $^1\text{H}$  NMR ( $\text{DMF-d}_7$ ) spectra of *cis*- (1,3-dimepzi)<sub>2</sub>Cl<sub>2</sub> (compound **7**) in comparison to its *trans*- congener and 1,3-dimethyl-5-nitropyrazole.

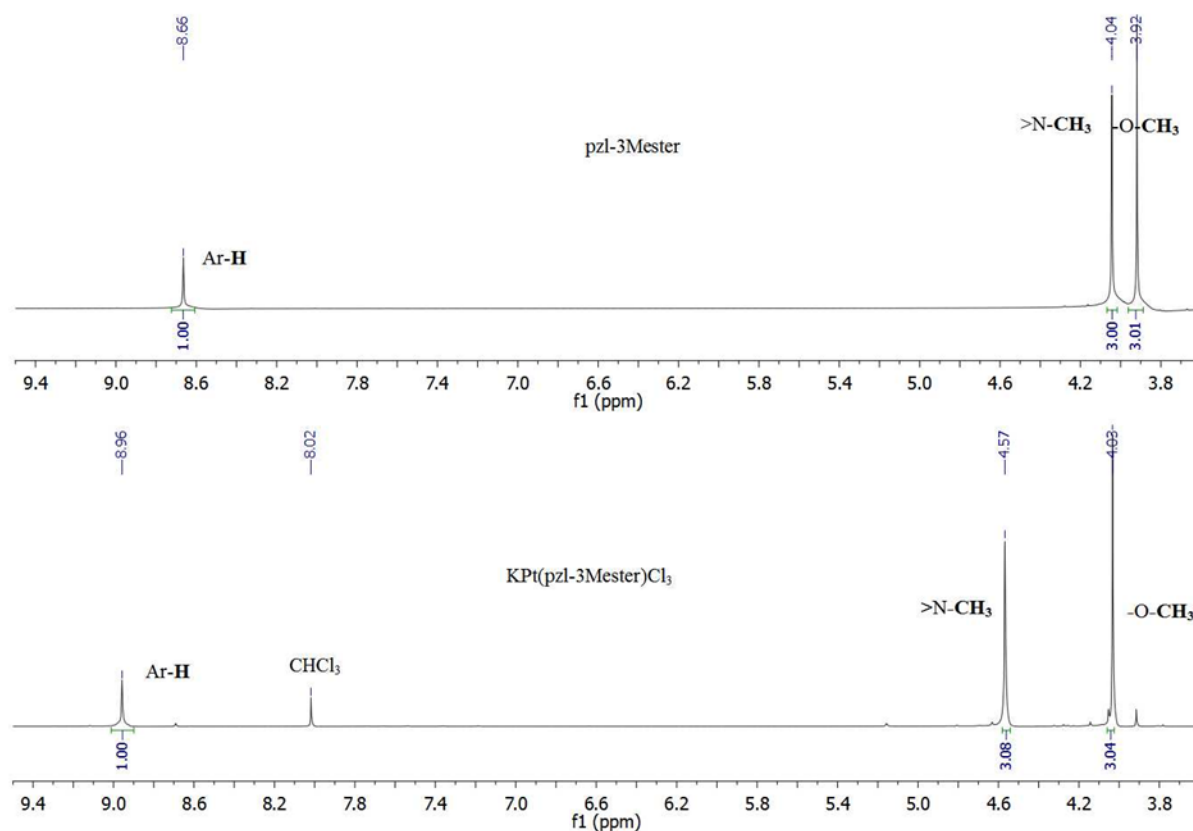

**Fig. S26** Experimental  $^1\text{H}$  NMR (acetone- $d_6$ ) spectra of  $\text{KPt}(\text{pzl-3Mester})\text{Cl}_3$  (compound **8**) and 1-methyl-4-nitro-3-carboxylic acid methyl ester.

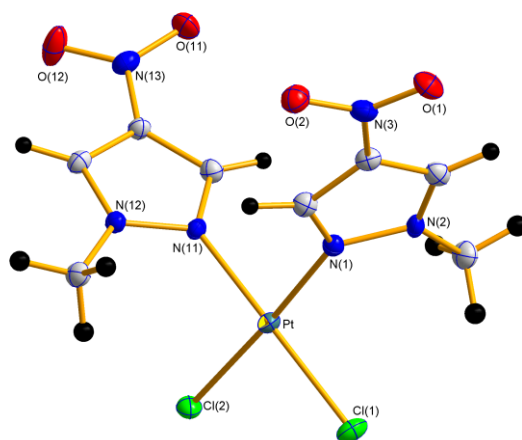

**Fig. S27** Molecular crystallographic structure determined on the basis of X-ray diffraction (XRD) for cis-dichloridobis(1-methyl-4-nitropyrazole)platinum(II) **1**. Thermal ellipsoids are drawn at the 50% probability level.

**Table 5.** Selected X-ray Data for Compound **1**

| Compound No                                                | <b>1</b>                                                                     |
|------------------------------------------------------------|------------------------------------------------------------------------------|
| Formula                                                    | <b>C<sub>8</sub>H<sub>10</sub>Cl<sub>2</sub>N<sub>6</sub>O<sub>4</sub>Pt</b> |
| Formula weight                                             | 520.20                                                                       |
| Temperature [K]                                            | 100(2)                                                                       |
| $\lambda$ [Å]                                              | 0.71073                                                                      |
| Crystal system                                             | Monoclinic                                                                   |
| Space group                                                | C2/c(No.15)                                                                  |
| a [Å]                                                      | 25.032(3)                                                                    |
| b [Å]                                                      | 9.461(3)                                                                     |
| c [Å]                                                      | 15.187(5)                                                                    |
| $\alpha$ [°]                                               |                                                                              |
| $\beta$ [°]                                                | 126.94(3)                                                                    |
| $\gamma$ [°]                                               |                                                                              |
| V [Å <sup>3</sup> ]                                        | 2874.7(18)                                                                   |
| Z, $\rho_{\text{calc}}$ [g cm <sup>-3</sup> ]              | 8, 2.404                                                                     |
| $\mu$ [mm <sup>-1</sup> ]                                  | 10.158                                                                       |
| F(000)                                                     | 1952                                                                         |
| Crystal size [mm]                                          | 0.10x0.08x0.05                                                               |
| $\theta$ range[°]                                          | 3.25-36.89                                                                   |
| rlns: total /unique                                        | 21034/6316                                                                   |
| Abs. corr.                                                 | analytical                                                                   |
| Min., max. transmission factors                            | 0.789/810                                                                    |
| Data/restraints/params                                     | 6316/0/192                                                                   |
| GOF on F <sup>2</sup>                                      | 0.901                                                                        |
| R <sub>1</sub> [I > 2 $\sigma$ (I)]                        | 0.0286                                                                       |
| wR <sub>2</sub> (all data)                                 | 0.0453                                                                       |
| Max., min. $\Delta\rho_{\text{elect}}$ [e Å <sup>3</sup> ] | 1.150/-1.426                                                                 |

CCDC reference number for compound **1**: CCDC924455

For the crystal **1** data collection were carried out using a KM4-CCD diffractometer,  $\omega$  scans, and graphite-monochromated Mo-K $\alpha$  radiation generated from a diffraction X-ray tube operating at 50 kV and 25 mA. Data were corrected for Lorentz and polarization effects. Absorption corrections were performed for the intensity data ( $T_{\text{min}} = 0.678$  and  $T_{\text{max}} = 0.789$ ) with CrysAlisPro data collection and processing software (Oxford Diffraction, CrysAlis RED, CrysAlisCCD (Version 1.171.30); Oxford Diffraction Ltd., Abingdon, Oxfordshire, UK (2004)). The structure was solved by direct methods (SHELXS97) [1] and refined by the full-matrix least-squares method on all F<sup>2</sup> data (SHELXL97) [2]. The atoms H atoms were included from the geometry of molecules and were not refined. Crystal data and details of data collection and refinement procedures are collected in **Table 5**. The reflection intensities were treated by the PLATON program (version 281019) with 'squeeze' procedure, because the position of a solvent molecule was not determined [3].

[1] SHELXS97, G. M. Sheldrick, SHELXS97, Program for the Solution of Crystal Structures; University of Göttingen, Germany (1997).

[2] SHELXL97, G. M. Sheldrick, SHELXL97, Program for the Refinement of Crystal Structures; University of Göttingen, Germany.

[3] Spek, A. L. (2009), Acta Cryst. D65, 148-159 *PLATON. A Multipurpose Crystallographic Tool*. Utrecht University, The Netherlands. (<http://www.cryst.chem.uu.nl/platon>.)
